# Supplementary material for: Multifocal Neuroblastoma and Central Hypoventilation in An Infant with Germline ALK F1174I Mutation
Source: MDPI journal article supplement (doi:10.3390/diagnostics12092260), 2022-09-19
Supplement: s1 [file s1]

**Table S1. Comparison of present case with cases as reported in de Pontual et al [31].**

|                                        | Case Presented                                                                                                                                 | Case 1 - de Pontual et al                                                                                               | Case 2 - de Pontual et al                                                                                               |
|----------------------------------------|------------------------------------------------------------------------------------------------------------------------------------------------|-------------------------------------------------------------------------------------------------------------------------|-------------------------------------------------------------------------------------------------------------------------|
| <b>Sex</b>                             | female                                                                                                                                         | female                                                                                                                  | female                                                                                                                  |
| <b>Gestational age</b>                 | 32 weeks                                                                                                                                       | full term                                                                                                               | 31 weeks                                                                                                                |
| <b>Birth Weight</b>                    | 1890 g (-0,5 SD)                                                                                                                               | 3100 g                                                                                                                  | 1300 g                                                                                                                  |
| <b>Birth Length</b>                    | 43 cm (+/-0 SD)                                                                                                                                | 46 cm                                                                                                                   | not specified                                                                                                           |
| <b>Head Circumference</b>              | 31.5 cm (+1SD)                                                                                                                                 | 34 cm                                                                                                                   | 28.5 cm                                                                                                                 |
| <b>Growth</b>                          | poor overall growth, deceleration of head growth                                                                                               | deceleration of head growth                                                                                             | poor overall growth, deceleration of head growth                                                                        |
| <b>Age at NB diagnosis</b>             | 4 weeks                                                                                                                                        | 3 days                                                                                                                  | 3 weeks                                                                                                                 |
| <b>NB presentation</b>                 | multifocal lobular masses in abdomen and thorax                                                                                                | adrenal NB with pelvic extension, rapid tumor progression                                                               | bilateral large heterogenous and calcified adrenal masses                                                               |
| <b>NB histology</b>                    | undifferentiated in thoracic tumor, ganglioneuroblastoma in abdomen                                                                            | not specified                                                                                                           | infiltrating islands of undifferentiated neuroblasts.                                                                   |
| <b>NB genetic profile</b>              | non-MNA, numerical only (sample 1&2), other segmental aberrations (sample 3)                                                                   | non-MNA, non-1p-del (FISH)                                                                                              | non-MNA, 4 copies of MYCN, trisomy 1, trisomy 9, tetrasomy 17 (FISH)                                                    |
| <b>Germline <i>PHOX2B</i> mutation</b> | no                                                                                                                                             | no                                                                                                                      | no                                                                                                                      |
| <b>Germline <i>ALK</i> mutation</b>    | F1174I, <i>de novo</i>                                                                                                                         | F1245V, <i>de novo</i>                                                                                                  | F1174V, <i>de novo</i>                                                                                                  |
| <b>Congenital Malformations</b>        | diaphragmatic hernia, unilateral inguinal hernia                                                                                               | (high arched palate)                                                                                                    | tracheobronchomalacia, bilateral inguinal hernias, patent foramen ovale                                                 |
| <b>Intestinal Findings</b>             | hypomotile; no abnormal enteric plexuses                                                                                                       | hypomotile; no abnormal enteric plexuses                                                                                | hypomotile; no abnormal enteric plexuses                                                                                |
| <b>Autonomic Instability</b>           | frequent episodes of apneas, hypoventilation and desaturation                                                                                  | episodes of apneas and desaturation                                                                                     | daily episodes of desaturation; temperature instability                                                                 |
| <b>CCHS workup</b>                     | polysomnography: apneas independent of epileptic activity; reduced heart rate variability consistent with CCHS                                 | CCHS initially suspected but ruled out due to independence from sleep-awake state and absence of <i>PHOX2B</i> mutation | CCHS initially suspected but ruled out due to independence from sleep-awake state and absence of <i>PHOX2B</i> mutation |
| <b>Neurologic Symptoms</b>             | atrophic muscles, abnormal movements, contractures, possibly deviant eyesight behaviour; neurogenic bladder dysfunction; intact sucking reflex | hypotonia, scarce spontaneous movement, absence of sucking and swallowing reflexes                                      | hypotonia, scarce spontaneous movement, poor sucking, swallowing difficulties; abnormal movements of right arm and leg  |
| <b>EEG findings</b>                    | epileptiform activity but clinical seizures without corresponding EEG changes                                                                  | slow activity; no signs of epilepsy                                                                                     | no epileptiform activity                                                                                                |
| <b>Brain MRI</b>                       | normal brain MRI including brainstem                                                                                                           | abnormal shape of brainstem                                                                                             | abnormal shape of brainstem                                                                                             |
| <b>Cause of Death</b>                  | respiratory failure                                                                                                                            | apnea; no attempt at resuscitation                                                                                      | withdrawal of intensive care                                                                                            |
| <b>Age at Death</b>                    | 3 months                                                                                                                                       | 4.5 months                                                                                                              | 9 months                                                                                                                |
